# Supplementary material
Source: HighWire-hosted journal article supplement (https://jnm.snmjournals.org/highwire/filestream/95185/field_highwire_adjunct_files/0/185314_Supplemental_Data.pdf)

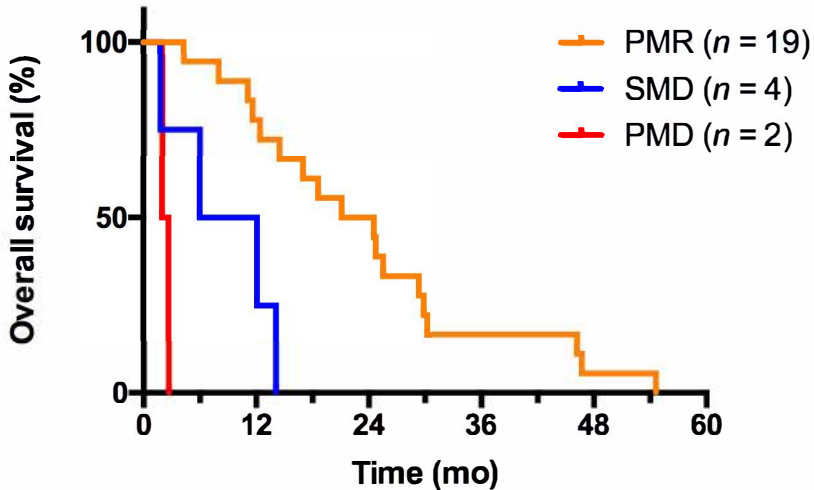

Supplement: 185314_Supplemental_Data.pdf [file 185314_Supplemental_Data.pdf]
